# Supplementary material for: Hazel Leaf Polyphenol Extract Alleviated Cisplatin-Induced Acute Kidney Injury by Reducing Ferroptosis through Inhibiting Hippo Signaling
Source: MDPI journal article supplement (doi:10.3390/molecules29081729), 2024-04-11
Supplement: s1 [file s1]

**Table S1. Ingredients contained in hazel leaf polyphenols**

| Compound                  | Chemical formula                               | Structural formula                                                                  | Classification of compounds | Relative content( $\times 10^4$ ) |
|---------------------------|------------------------------------------------|-------------------------------------------------------------------------------------|-----------------------------|-----------------------------------|
| Gallic acid               | C <sub>7</sub> H <sub>6</sub> O <sub>5</sub>   | 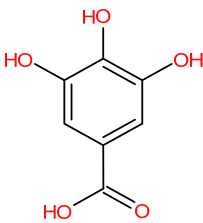  | FP, BCP, ACP, BBP, ABP      | 31.3 ± 6.22                       |
| Galocatechin              | C <sub>15</sub> H <sub>14</sub> O <sub>7</sub> |   | FP                          | 2.79 ± 0.57                       |
| 2,5-dihydroxybenzoic acid | C <sub>7</sub> H <sub>6</sub> O <sub>4</sub>   |   | FP, BCP, ABP                | 5.78 ± 1.26                       |
| Chlorogenic acid          | C <sub>16</sub> H <sub>18</sub> O <sub>9</sub> |  | FP                          | 4.13 ± 0.21                       |

Quercetin-3-O-beta-D-glucopyranoside

C<sub>21</sub>H<sub>20</sub>O<sub>12</sub>

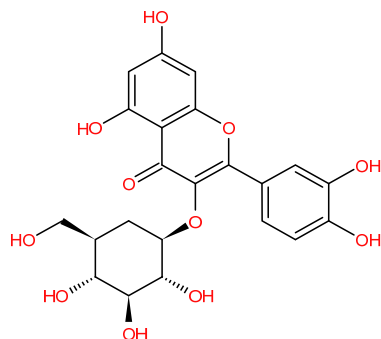

FP, BBP

36.75 ± 7.61

P-Coumaric acid

C<sub>9</sub>H<sub>8</sub>O<sub>3</sub>

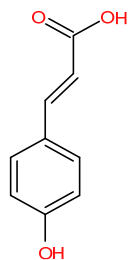

FP, ACP, BBP

16.33 ± 3.89

Myricetin

C<sub>15</sub>H<sub>10</sub>O<sub>8</sub>

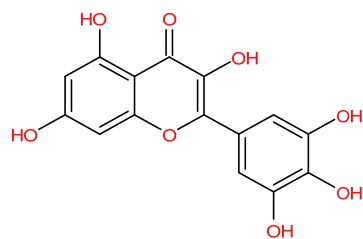

FP, ACP, ABP

74.32 ± 12.87

Pedalitin

C<sub>16</sub>H<sub>12</sub>O<sub>7</sub>

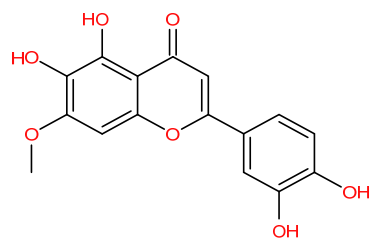

FP

4.23 ± 0.91

Quercetin

C<sub>15</sub>H<sub>10</sub>O<sub>7</sub>

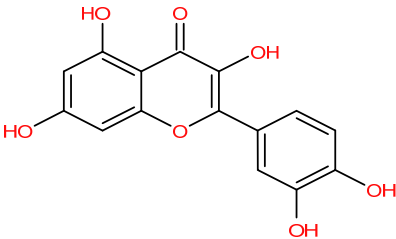

FP, ACP, ABP

154.91 ± 24.28

Luteolin-7-O-glucoside

C<sub>21</sub>H<sub>20</sub>O<sub>11</sub>

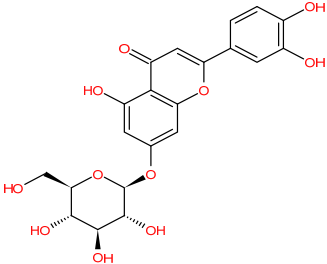

FP, BBP

73.07 ± 18.04

Caffeic acid

C<sub>9</sub>H<sub>8</sub>O<sub>4</sub>

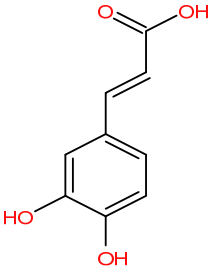

BCP, BBP

14.27 ± 2.07

Resveratrol

C<sub>14</sub>H<sub>12</sub>O<sub>3</sub>

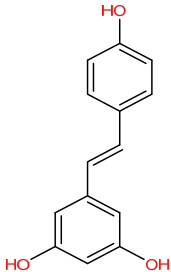

BCP

4.59 ± 0.52

Luteolin

C<sub>15</sub>H<sub>10</sub>O<sub>6</sub>

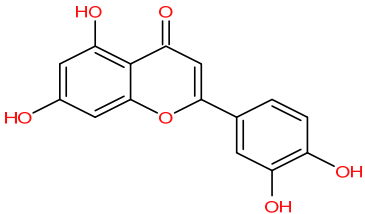

ACP, ABP

21.29 ± 6.22

|                                  |                                                 |                                                                                     |          |              |
|----------------------------------|-------------------------------------------------|-------------------------------------------------------------------------------------|----------|--------------|
| Ellagic acid                     | C <sub>14</sub> H <sub>6</sub> O <sub>8</sub>   | 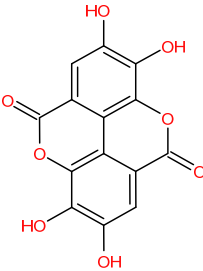  | ACP      | 15.79 ± 4.37 |
| Hydroxybenzoic acid              | C <sub>7</sub> H <sub>6</sub> O <sub>3</sub>    |   | BBP, ABP | 6.25 ± 1.30  |
| Quercetin-3-O-beta-D-glucuronide | C <sub>21</sub> H <sub>18</sub> O <sub>13</sub> |   | BBP      | 6.43 ± 0.60  |
| Kaempferol-3-O-rhamnoside        | C <sub>21</sub> H <sub>20</sub> O <sub>10</sub> |  | BBP      | 27.77 ± 5.36 |

---

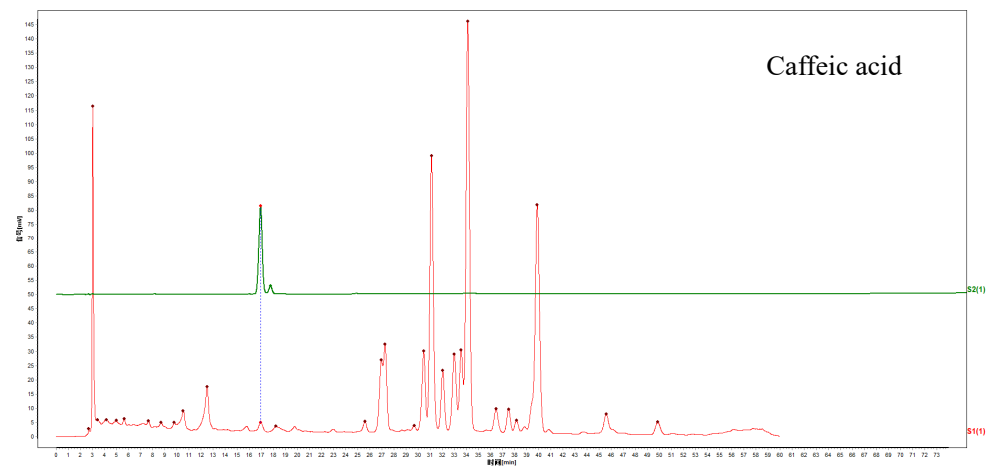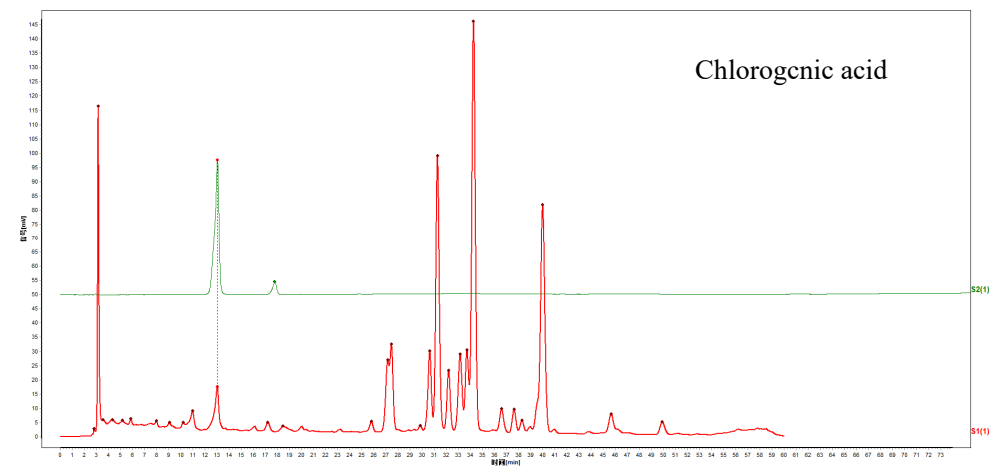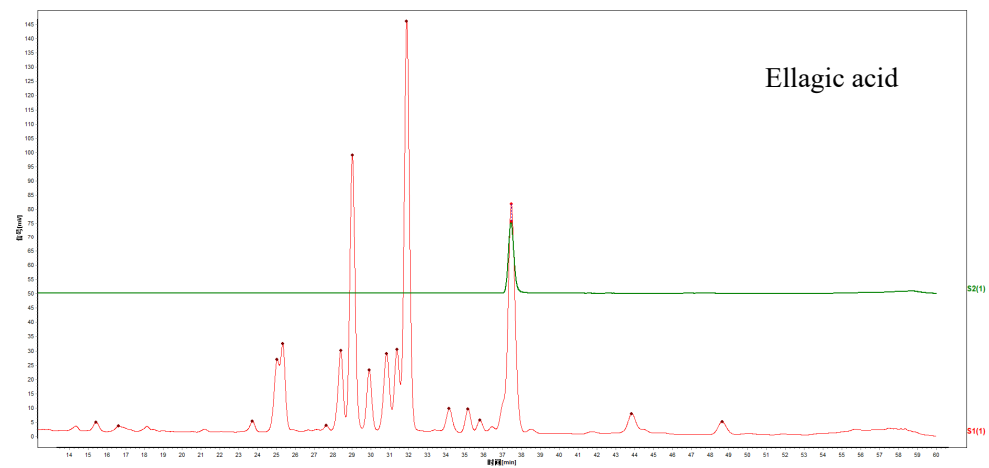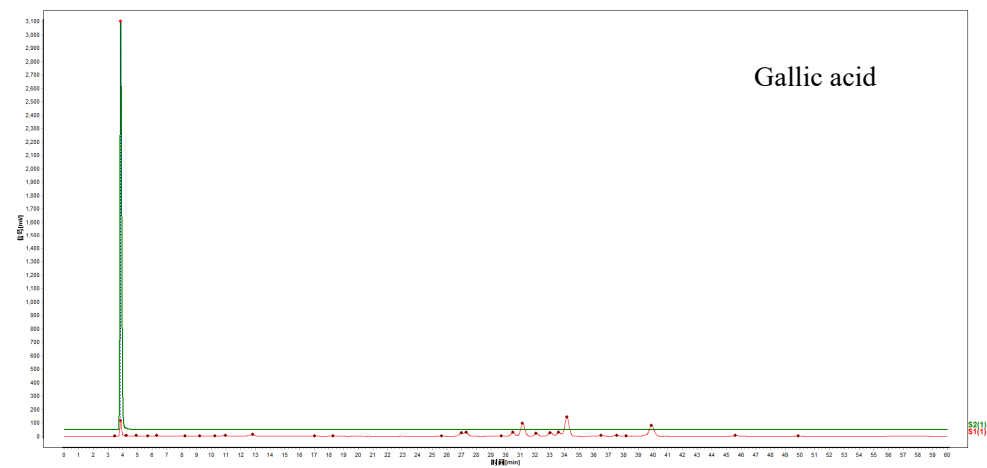

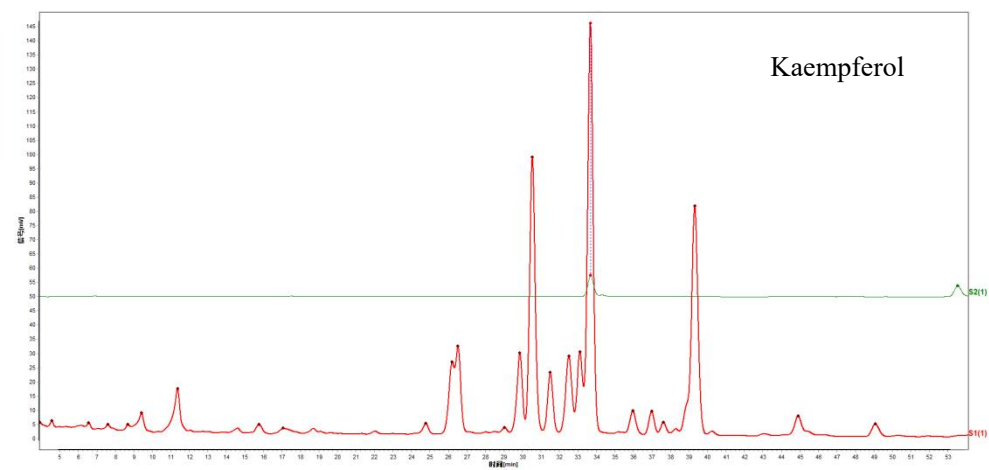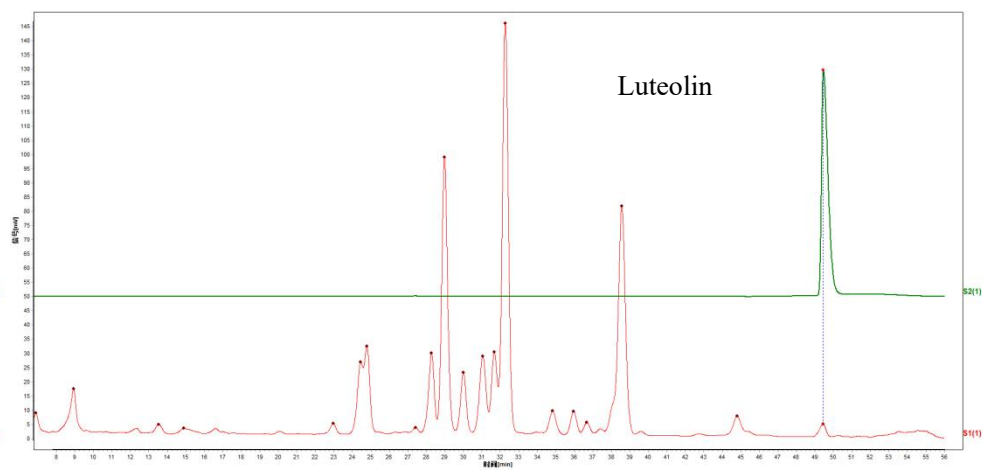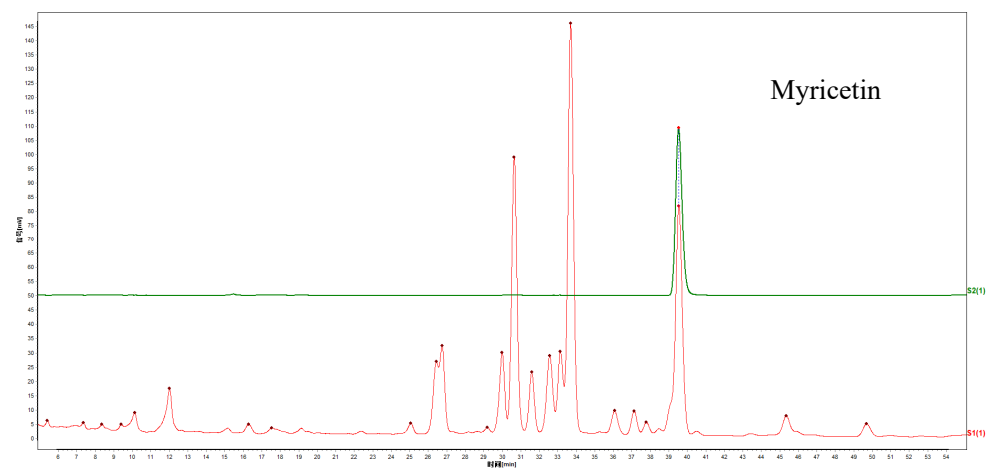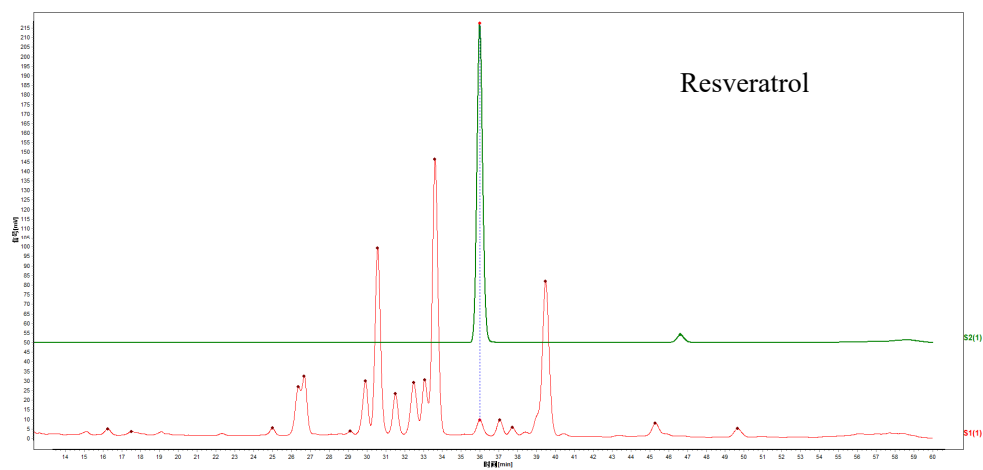

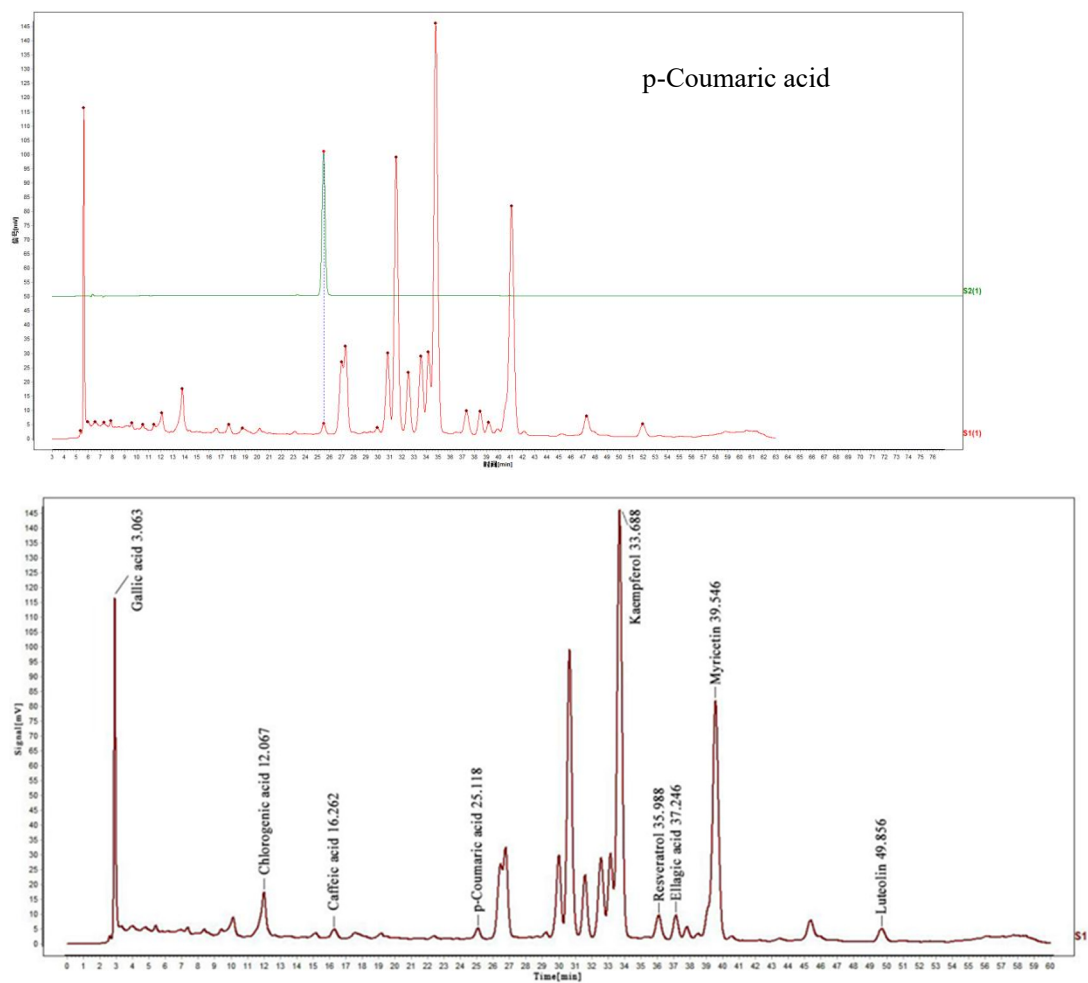

**Figure S1. Composition of hazelnut leaf polyphenols versus standards**
